# Supplementary material for: Unexpected ultrafast and high adsorption capacity of oxygen vacancy-rich WOx/C nanowire networks for aqueous Pb2+ and methylene blue removal
Source: Royal Society of Chemistry journal article supplement (doi:10.1039/c7ta04377e), 2017-01-01
Supplement: c7ta04377e1.pdf [file c7ta04377e1.pdf]

**Unexpected ultrafast and high adsorption capacity of oxygen vacancy-rich WO<sub>x</sub>/C  
nanowire networks for aqueous Pb<sup>2+</sup> and methylene blue removal**

Shouwei Zhang,<sup>†a,c,d</sup> Hongcen Yang,<sup>†a</sup> Huiyan Huang,<sup>b</sup> Huihui Gao,<sup>a</sup> Ruya Cao,<sup>a</sup>  
Xiangxue Wang,<sup>d</sup> Jiaxing Li,<sup>c,d\*</sup> Xijin Xu,<sup>a\*</sup> Xiangke Wang<sup>d\*</sup>

<sup>a</sup>School of Physics and Technology, University of Jinan, Shandong, 250022, P. R.  
China. \*E-mail: [sps\\_xuxj@ujn.edu.cn](mailto:sps_xuxj@ujn.edu.cn)

<sup>b</sup>School of Chemical and Environmental Engineering, Wuyi University, Jiangmen  
529020, China.

<sup>c</sup>Institute of Plasma Physics, Chinese Academy of Sciences P.O. Box 1126, 230031  
Hefei, P. R. China Tel: +86-551-65596617, Fax: +86-551-65591310, \*E-mail:  
[lijx@ipp.ac.cn](mailto:lijx@ipp.ac.cn)(J. Li)

<sup>d</sup>School of Environmental Science and Engineering, North China Electric Power  
University, Beijing 102206, PR China \*E-mail: [xkwang@ncepu.edu.cn](mailto:xkwang@ncepu.edu.cn)

<sup>†</sup>These authors contributed equally to this work.

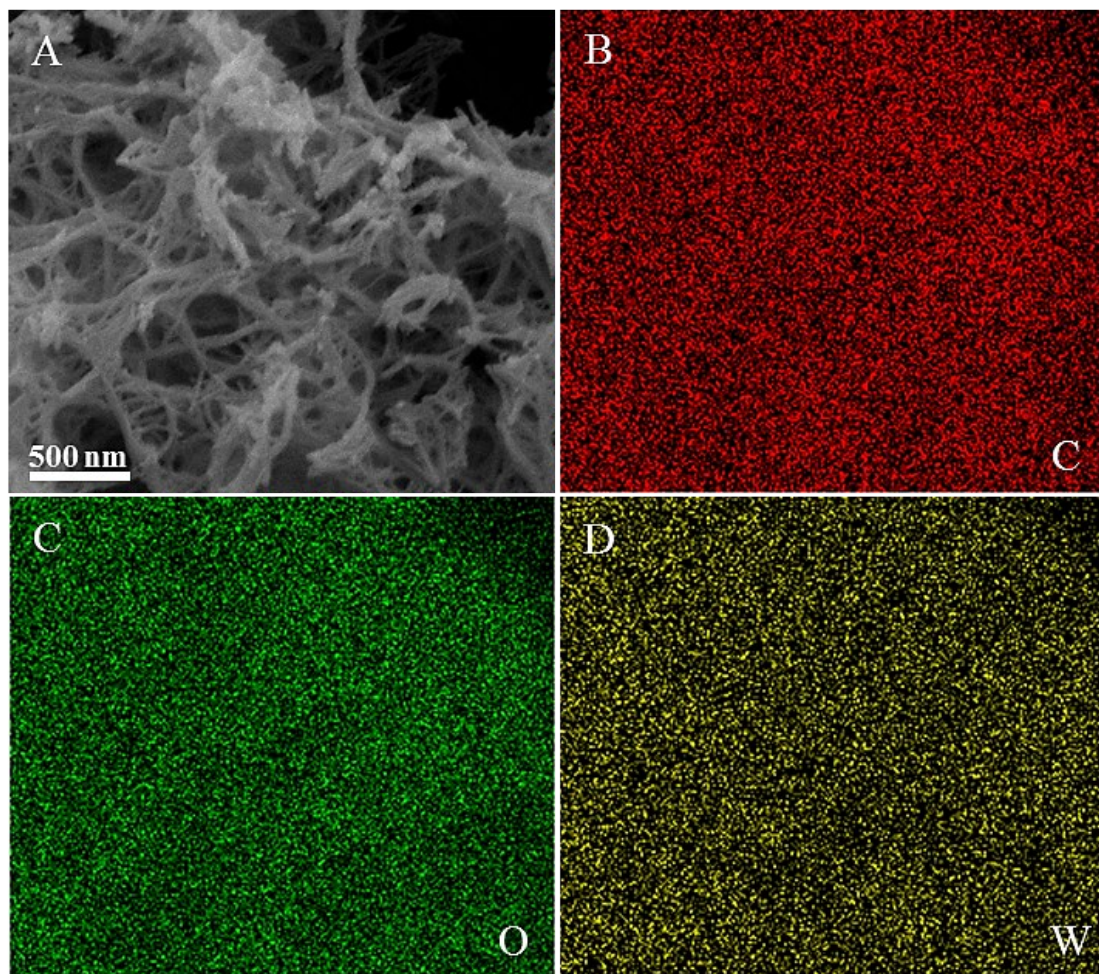

Figure S1. The element mapping of W, O and C of  $\text{WO}_x/\text{C}$  nanowire networks.

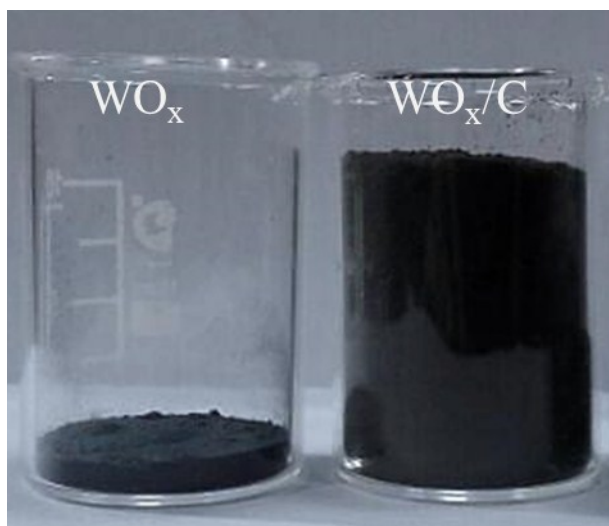

Figure S2. Photo of  $\text{WO}_x$  and  $\text{WO}_x/\text{C}$  nanowire networks from one batch process.

The adsorption behaviors of MO (anionic dyes) on  $\text{WO}_x@\text{C}$  networks were investigated. The maximum capacities based on the experiment data were  $\sim 1188.3$  mg/g for MB and 154.1 mg/g for MO, respectively. The different adsorption behaviors of MB (cationic dyes) and MO (anionic dyes) on  $\text{WO}_x@\text{C}$  are due to the fact that they carry opposite charges. Zeta potential results indicated that  $\text{WO}_x@\text{C}$  nanowire networks are negative over the entire pH range from  $\sim 2.0$  to 12.0, and thus can more effectively capture positively charged dyes by electrostatic attraction.

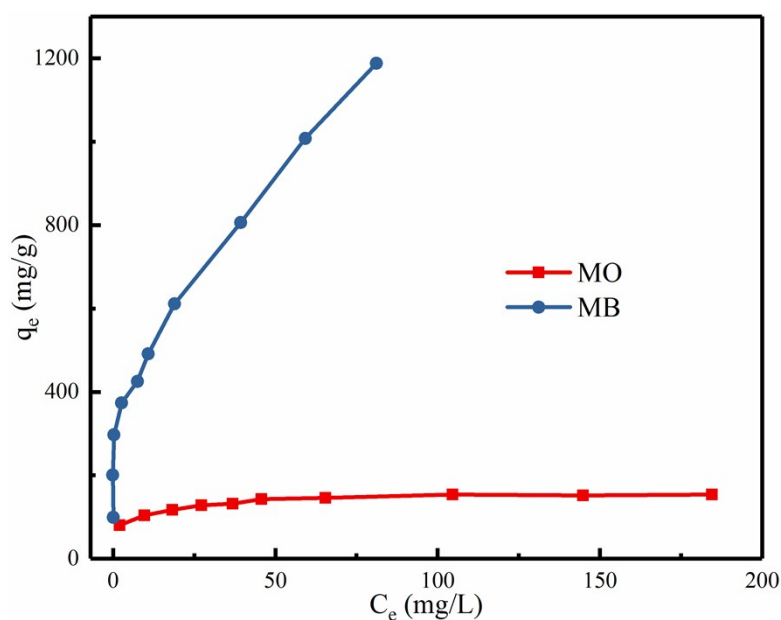

Figure S3. Adsorption isotherms of MB and MO on  $\text{WO}_x@\text{C}$  nanowire networks.

The reusability is a key factor for an adsorbent and Figure S4 indicated the cycle performance of the  $\text{WO}_x/\text{C}$  nanowire networks toward MB adsorption. After 5 cycles, the MB removal efficiency changes from  $\sim 99.7\%$  to  $94.3\%$ . Namely, the adsorption capacity of  $\text{WO}_x/\text{C}$  networks for MB decrease slowly with increasing cycle number. Such a decrease is unavoidable due to the wastage of the adsorbent during each cycle. Therefore, the excellent stability makes the fabricated  $\text{WO}_x/\text{C}$  nanowire networks a perfect candidate for environment remediation.

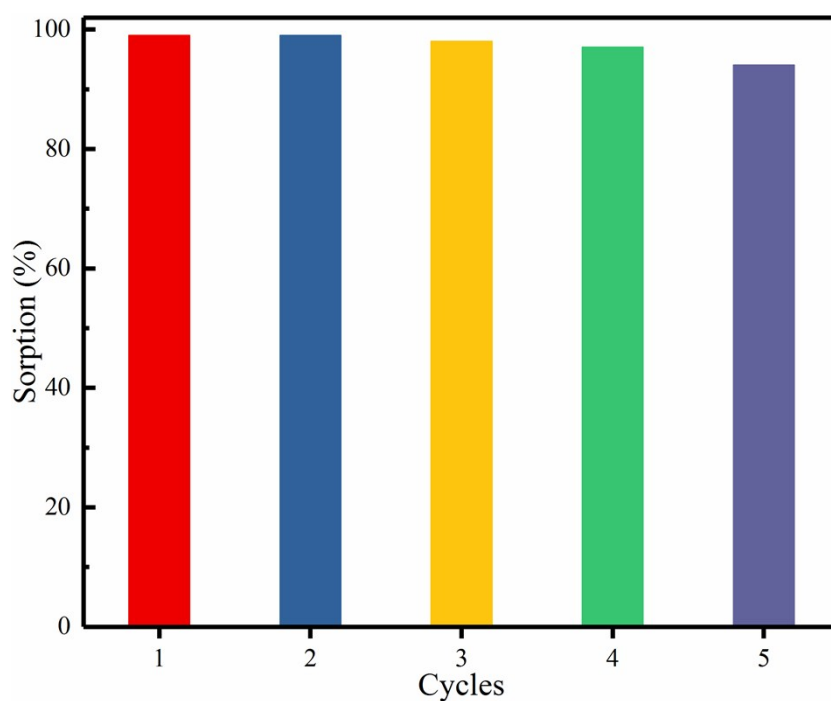

Figure S4. The recycle performance of  $\text{WO}_x/\text{C}$  networks toward 80 mg/L MB solution.

The pH value of the solution had a significant influence on the adsorption of  $\text{Pb}^{2+}$  on the  $\text{WO}_x/\text{C}$  networks. The uptake of  $\text{Pb}^{2+}$  increased with increasing pH values (see Figure S5A). The surface of  $\text{WO}_x/\text{C}$  networks is negatively charged and thus can capture positively charged pollutants by electrostatic attraction. According to the zeta-potential results, the surface charge on  $\text{WO}_x/\text{C}$  is larger at higher pH values, which results in enhancement of the electrostatic attraction between  $\text{WO}_x/\text{C}$  and  $\text{Pb}^{2+}$  ions. In addition, the number of available adsorption sites on the  $\text{WO}_x/\text{C}$  increased at higher pH values due to deprotonation. Therefore, higher pH values are favorable for adsorption removal of  $\text{Pb}^{2+}$  from solution using  $\text{WO}_x/\text{C}$  networks.  $\text{Pb}^{2+}$  tends to be precipitated at high pH as it forms complexes with hydroxide ions. In this work, pH value of  $\sim 5$  was chosen as the initial pH for  $\text{Pb}^{2+}$  adsorption tests.

The effects of foreign cations on adsorption efficiency were further investigated at pH  $\sim 5$  in the presence of common competing cations ( $\text{Na}^+$  and  $\text{Ca}^{2+}$ ). As shown in Figure S5B, upon addition of  $\text{Na}^+$ , no significant change in the adsorption capacity can be observed over the concentration of  $\text{Na}^+$  ranging from 0.001 to 0.1 M. By contrast, the presence of  $\text{Ca}^{2+}$  can slightly reduce the  $\text{Pb}^{2+}$  adsorption capacity. The decrease of adsorption capacity upon addition of  $\text{Ca}^{2+}$ , nevertheless, it should be noted that the  $\text{WO}_x/\text{C}$  networks still showed a considerably high adsorption capacity for  $\text{Pb}^{2+}$ , even when the high concentration  $\text{Ca}^{2+}$ . The result suggests that the coordination interaction between  $\text{Pb}^{2+}$  and  $\text{WO}_x/\text{C}$  networks is considerably strong, so these foreign cations cannot well compete with  $\text{Pb}^{2+}$  ions for the adsorption sites of  $\text{WO}_x/\text{C}$ . These results also reveal that the novel  $\text{WO}_x/\text{C}$  adsorbent should be considerably promising in

capturing  $\text{Pb}^{2+}$  ions from interfering ions-containing aqueous solution.

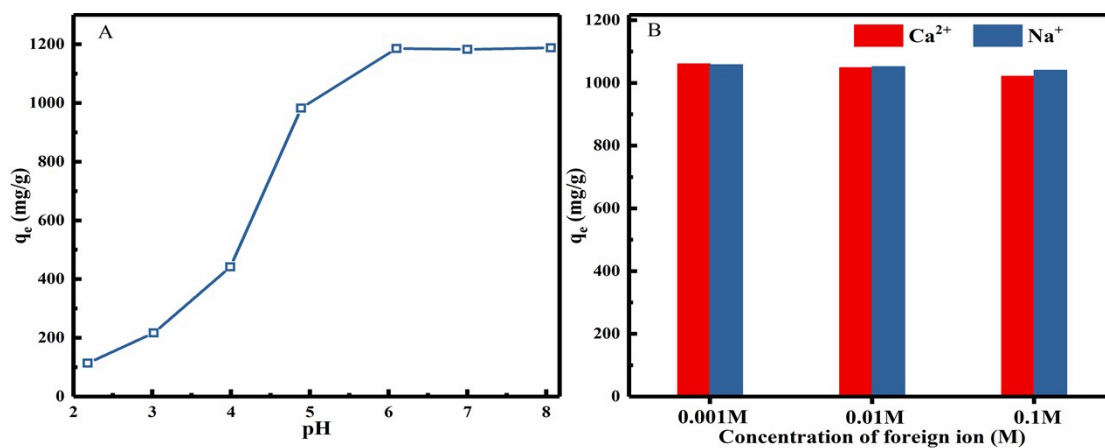

Figure S5. (A) Effect of pH on the adsorption of  $\text{Pb}^{2+}$  by the  $\text{WO}_x/\text{C}$  networks (initial  $\text{Pb}^{2+}$  concentration: 120 mg/L, time: 24 h,  $\text{NaNO}_3$  concentration: 0.01 M, 0.1 g/L sorbent); (B) Effect of ionic strength on the adsorption of  $\text{Pb}^{2+}$  by the  $\text{WO}_x/\text{C}$  networks (initial  $\text{Pb}^{2+}$  concentration: 120 mg/L, time: 24 h, pH  $\sim$ 5, 0.1 g/L sorbent).

As shown in Figure S6, the removal of  $\text{Pb}^{2+}$  was slightly reduced by the existence of MB at low initial  $\text{Pb}^{2+}$  concentrations, and was significantly enhanced by the existence of MB at high  $\text{Pb}^{2+}$  concentrations in the binary systems. This synergic effect could be explained as follows: there are specific and different active sites for the removal of  $\text{Pb}^{2+}$  and MB on the  $\text{WO}_x/\text{C}$  networks, and then the appearance of MB on the surface of the  $\text{WO}_x/\text{C}$  networks would offer additional nitrogen and sulfur-containing groups, which might provide new active sites for capturing  $\text{Pb}^{2+}$ . However, the removal of dyes was not enhanced by the presence of  $\text{Pb}^{2+}$  for binary systems at similar conditions. One reasonable explanation could be due to that the presence of  $\text{Pb}^{2+}$  on the surface of the  $\text{WO}_x/\text{C}$  networks could not provide extra active sites for the removal of dyes, leading to the competition for the available removal sites.

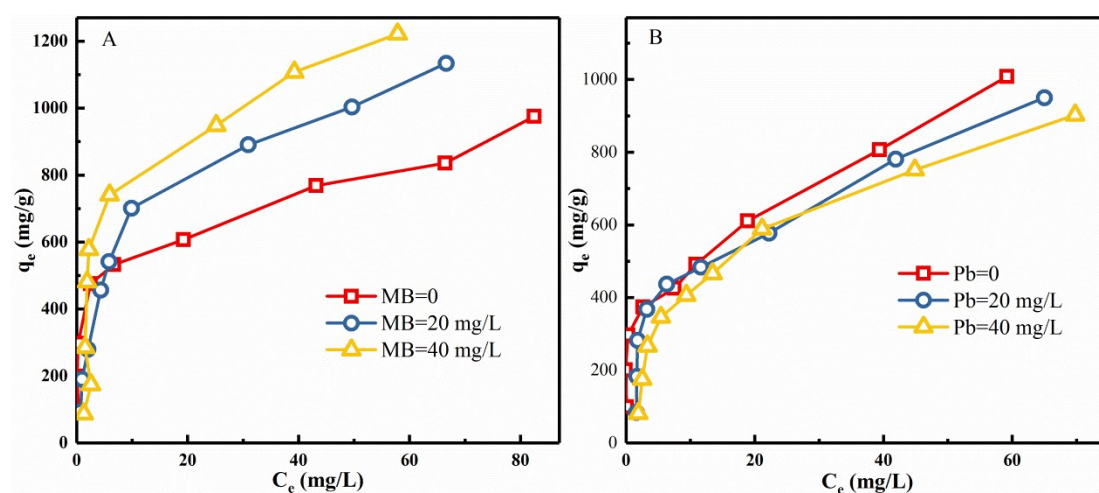

Figure S6. The removal of  $\text{Pb}^{2+}$  and MB on the  $\text{WO}_x/\text{C}$  networks using binary solutions.



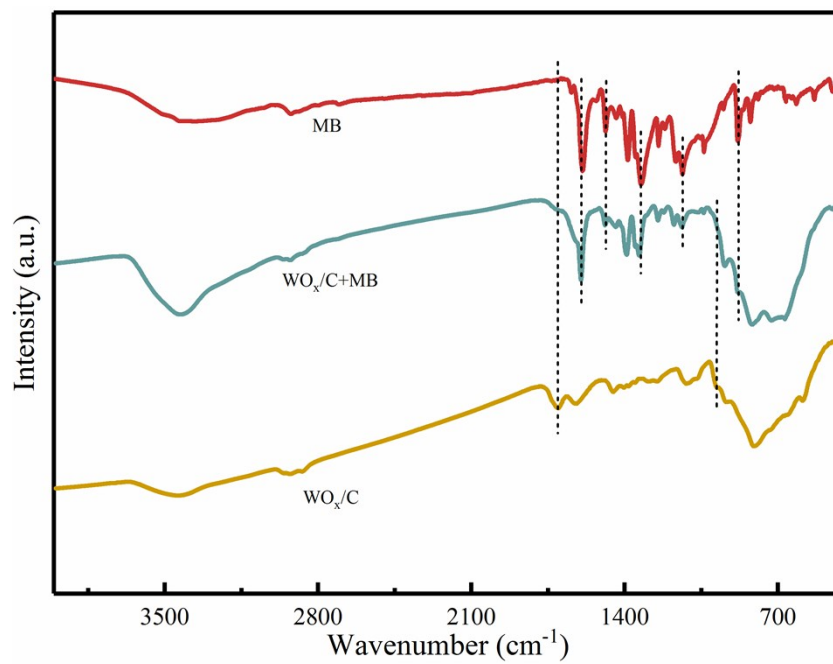

Figure S7. FTIR spectra of WO<sub>x</sub>/C before and after MB adsorption.

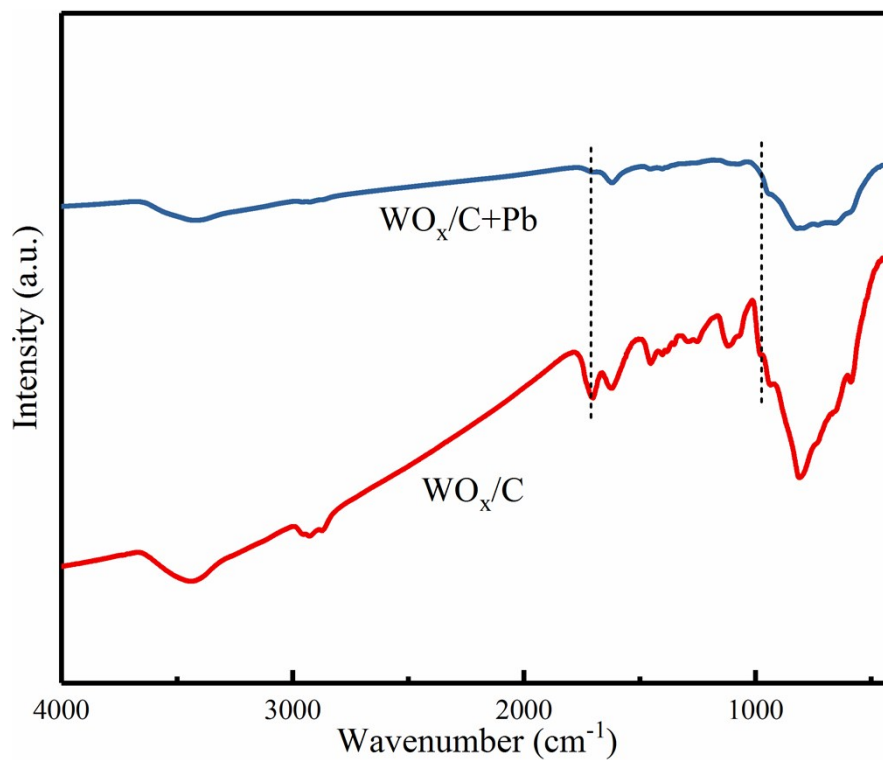

Figure S8. FTIR spectra of WO<sub>x</sub>/C before and after Pb<sup>2+</sup> adsorption.

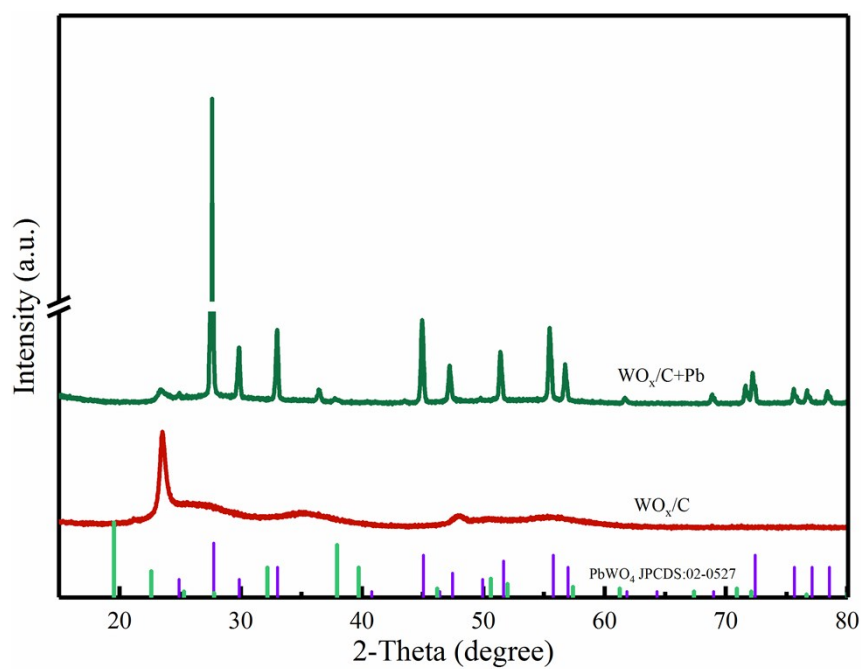

Figure S9. XRD patterns of WO<sub>x</sub>/C before and after Pb<sup>2+</sup> adsorption.

Table S1. Parameters for the kinetic adsorption data fitted by pseudo-first-order and pseudo-second-order models.

| Adsorbents         | Adsorbate        | $q_{e,exp}$<br>mg/g | Pseudo-first-order         |                      |       | Pseudo-second-order   |                      |       |
|--------------------|------------------|---------------------|----------------------------|----------------------|-------|-----------------------|----------------------|-------|
|                    |                  |                     | $K_1$<br>min <sup>-1</sup> | $q_{e,cal1}$<br>mg/g | $R^2$ | $K_2$<br>g/mg/min     | $q_{e,cal2}$<br>mg/g | $R^2$ |
| WO <sub>x</sub>    | Pb <sup>2+</sup> | 570.64              | 2.29                       | 604.73               | 0.997 | 3.27×10 <sup>-5</sup> | 561.07               | 0.992 |
|                    | MB               | 469.57              | 2.34                       | 500.11               | 0.998 | 2.33×10 <sup>-5</sup> | 465.84               | 0.992 |
| WO <sub>x</sub> /C | Pb <sup>2+</sup> | 773.19              | 4.86                       | 782.19               | 0.999 | 1.31×10 <sup>-4</sup> | 768.95               | 0.997 |
|                    | MB               | 618.24              | 5.21                       | 627.85               | 0.998 | 9.86×10 <sup>-5</sup> | 617.57               | 0.998 |

Table S2. Parameters of Langmuir and Freundlich models for adsorption of Pb<sup>2+</sup> and MB onto WO<sub>x</sub> and WO<sub>x</sub>/C.

| Adsorbents         | Adsorbate        | Langmuir isotherm constants |                |       | Freundlich isotherm constants                     |      |       |
|--------------------|------------------|-----------------------------|----------------|-------|---------------------------------------------------|------|-------|
|                    |                  | $q_m$<br>mg/g               | $K_L$<br>L/min | $R^2$ | $K_F$<br>mg <sup>1-1/n</sup> /L <sup>1/n</sup> /g | 1/n  | $R^2$ |
| WO <sub>x</sub>    | Pb <sup>2+</sup> | 628.88                      | 0.12           | 0.984 | 39.19                                             | 0.23 | 0.917 |
|                    | MB               | 562.17                      | 0.17           | 0.944 | 77.51                                             | 0.21 | 0.951 |
| WO <sub>x</sub> /C | Pb <sup>2+</sup> | 1078.83                     | 0.14           | 0.823 | 61.55                                             | 0.27 | 0.961 |
|                    | MB               | 1301.21                     | 0.06           | 0.825 | 85.16                                             | 0.36 | 0.959 |
